# Supplementary material for: The Y-linked proto-oncogene TSPY contributes to poor prognosis of the male hepatocellular carcinoma patients by promoting the pro-oncogenic and suppressing the anti-oncogenic gene expression
Source: Cell Biosci. 2019 Mar 4;9:22. doi: 10.1186/s13578-019-0287-x (PMC6399826; doi:10.1186/s13578-019-0287-x)
Supplement: Supplementary file 7 — Additional file 7: Table S4. Detailed description of 16 genes potentially regulated by TSPY and associated with prognoses in HCC patients. [file 13578_2019_287_MOESM7_ESM.xlsx]

## Sheet: Sheet1
	Table S4. Detailed description of 16 genes potentially regulated by TSPY and associated with prognoses in HCC patients.
	Categoly	Gene symbol (alias)	Full name	Functions*	Effect by TSPY	Effect to HCC survival	Reported roles in HCC and/or other cancer	Refferences
	DNA replication	CDC45	Cell division cycle 45	An initiator for chromosomal DNA replication by recruiting DNA polymerase to chromatin	Upregulated	Unfavorable
		PRIM1	DNA primase subunit 1	A component of the DNA polymerase synthesizing RNA primers for the Okazaki fragments	Upregulated	Unfavorable	PRIM1 is involved in the estrogen-induced breast cancer formation by activating G2/M checkpoint.	[1]
		RRM2	Ribonucleotide reductase regulatory subunit M2	A ribonucleotide reductase catalyzing the biosynthesis of deoxyribonucleotides from ribonucleotide	Upregulated	Unfavorable	High level expression of RRM2 associate with poor prognosis of HCC and colon cancer.	[2]
	G2/M phases progression	BUB1	BUB1 mitotic checkpoint serine/threonine kinase	A Ser/Thr protein kinase playing a central role in the spindle checkpoint.	Upregulated	Unfavorable	BUB1 is crucial for cell proliferation and invasion of HCC, and is considered as a biomarker of HCC.	[3, 4]
		CDC25B	Cell division cycle 25B	A Thr protein phosphatase activating CDC2 and CDK1, playing key roles in initiation of G2/M phase	Upregulated	Unfavorable	CDC25B is involved in tumor growth of HCC.	[5, 6]
		CENPA	Centromere protein A	A centromere protein required for the recruitment of kinetochore proteins to centromere	Upregulated	Unfavorable	CENPA is involved in growth of HCC.	[7]
		PRC1	Protein regulator of cytokinesis 1	A key regulator of cytokinesis by forming spatiotemporal midzone with KIF14, central spindle and midbody	Upregulated	Unfavorable	PRC1 associates with the Wnt/beta-catenin signalling, and promote recurrence of HCC, and also tumorigenesis of lung cancer.	[8, 9]
		SPC24	SPC24, NDC80 kinetochore complex component	A component of NDC80 complex organizing the stable microtubule binding sites of the kinetochore	Upregulated	Unfavorable	SPC24 is upregulated in HCC, and also contributes to progressin of lung cancer and breast cancer	[11-12]
	Membrane receptors	ADGRD1 (GPR133)	Adhesion G protein-coupled receptor D1	A G-protein-coupled membrane receptor	Upregulated	Unfavorable	ADGRD1 plays a pro-tumorigenic function in glioblastoma.	[13]
		HMMR (RHAMM)	Hyaluronan mediated motility receptor	A receptor of hyaluronic acid (HA); intracellular HMMR plays a role in cytokinesis	Upregulated	Unfavorable	Upregulated expression of HMMR associates with poor survival of HCC patients. It may be involved in transformation, metastasis , and stemness.	[14, 15]
	DNA repair, recombination	EXO1	Exonuclease 1	A DNA exonuclease functioning in DNA mismatch repair	Upregulated	Unfavorable	Polymorphism of the EXO1 gene associates with susceptibility to HCC and other cancer types.	[16, 17]
		RAD51	RAD51 recombinase	A component of the DNA repairing machinery in homologous recombination	Upregulated	Unfavorable	RAD51 may contribute to the drug resisgance of HCC and lung cancer.	[18, 19]
	Others	EGLN3 (PDH3)	Egl-9 family hypoxia inducible factor 3	A prolyl hydroxylase regulating the activities of HIFs	Upregulated	Unfavorable**	Downregulation of EGLN3 associate with poor prognosis of HCC. Its over-expression mediates inhibition of tumor growth of pancreac cancer.	[20, 21]
		PPARGC1A (PGC-1a)	PPARG coactivator 1 alpha	A transcriptional coactivator of PPARgammma	Downregulated	Favorable	PPARGC1A plays roles as a tumor suppressor in HCC, and frequently downregulated in HCC.	[22, 23]
		SLC25A25	Solute carrier family 25 member 25	A caclium-dependent mitochondrial solute carrier	Downregulated	Favorable	SLC25A25 was upregulated by anti-cancer drug Berberine in Hep-G2 cells.	[24]
		SOCS2	Suppressor of cytokine signaling 2	A negative regulator of cytokine receptor signaling	Downregulated	Favorable	SOCS2 inhibits progression and metastasis of HCC.	[25, 26]
	*, Information according to the NCBI gene database (https://www.ncbi.nlm.nih.gov/gene).
	**, The role of EGLN3 in HCC seem to be controversial. The results of datamining of TCGA dataset were inconsistent with the previous reports.
	References for Table S4
	1. Lee WH, Chen LC, Lee CJ, Huang CC, Ho YS, Yang PS, Ho CT, Chang HL, Lin IH, Chang HW, Liu YR, Wu CH, Tu SH. DNA primase polypeptide 1 (PRIM1) involves in estrogen-induced breast cancer formation through activation of the G2/M cell cycle ___checkpoint. Int J Cancer. 2019;144(3):615-630
	2. Lee B, Ha SY, Song DH, Lee HW, Cho SY, Park CK. High expression of ribonucleotide reductase subunit M2 correlates with poor prognosis of hepatocellular carcinoma. Gut Liver. 2014;8:662-8.
	3. Xu B, Xu T, Liu H, Min Q, Wang S, Song Q. MiR-490-5p Suppresses Cell Proliferation and Invasion by Targeting BUB1 in Hepatocellular Carcinoma Cells. Pharmacology. 2017;100:269-282.
	4. Li L, Lei Q, Zhang S, Kong L, Qin B. Screening and identification of key biomarkers in hepatocellular carcinoma: Evidence from bioinformatic analysis. Oncol Rep. 2017;38:2607-2618.
	5. Yan X, Chua MS, He J, So SK. Small interfering RNA targeting CDC25B inhibits liver tumor growth in vitro and in vivo. Mol Cancer. 2008;7:19.
	6. Zhong Y, Yang J, Xu WW, Wang Y, Zheng CC, Li B, He QY. KCTD12 promotes tumorigenesis by facilitating CDC25B/CDK1/Aurora A-dependent G2/M transition. Oncogene. 2017;36:6177-6189.
	7. Li Y, Zhu Z, Zhang S, Yu D, Yu H, Liu L, Cao X, Wang L, Gao H, Zhu M. ShRNA-targeted centromere protein A inhibits hepatocellular carcinoma growth. PLoS One. 2011;6:e17794.
	8. Chen J, Rajasekaran M, Xia H, Zhang X, Kong SN, Sekar K, Seshachalam VP, Deivasigamani A, Goh BK, Ooi LL, Hong W, Hui KM. The microtubule-associated protein PRC1 promotes early recurrence of hepatocellular carcinoma in association with the ___Wnt/beta-catenin signalling pathway. Gut. 2016;65:1522-34.
	9. Zhan P, Zhang B, Xi GM, Wu Y, Liu HB, Liu YF, Xu WJ, Zhu QQ, Cai F, Zhou ZJ, Miu YY, Wang XX, Jin JJ, Li Q, Qian LP, Lv TF, Song Y. PRC1 contributes to tumorigenesis of lung adenocarcinoma in association with the Wnt/beta-catenin signaling ___pathway. Mol Cancer. 2017;16:108.
	10. Zhu P, Jin J, Liao Y, Li J, Yu XZ, Liao W, He S. A novel prognostic biomarker SPC24 up-regulated in hepatocellular carcinoma. Oncotarget. 2015;6:41383-97.
	11. Zhou J, Yu Y, Pei Y, Cao C, Ding C, Wang D, Sun L, Niu G. A potential prognostic biomarker SPC24 promotes tumorigenesis and metastasis in lung cancer. Oncotarget. 2017;8:65469-65480.
	12. Zhou J, Pei Y, Chen G, Cao C, Liu J, Ding C, Wang D, Sun L, Xu P, Niu G. SPC24 Regulates breast cancer progression by PI3K/AKT signaling. Gene. 2018;675:272-277.
	13. Bayin NS, Frenster JD, Kane JR, Rubenstein J, Modrek AS, Baitalmal R, Dolgalev I, Rudzenski K, Scarabottolo L, Crespi D, Redaelli L, Snuderl M, Golfinos JG, Doyle W, Pacione D, Parker EC, Chi AS, Heguy A, MacNeil DJ, Shohdy N, Zagzag D, ___Placantonakis DG. GPR133 (ADGRD1), an adhesion G-protein-coupled receptor, is necessary for glioblastoma growth. Oncogenesis. 2016;5:e263.
	14. He X, Liao W, Li Y, Wang Y, Chen Q, Jin J, He S. Upregulation of hyaluronan-mediated motility receptor in hepatocellular carcinoma predicts poor survival. Oncol Lett. 2015;10:3639-3646.
	15. Tilghman J, Wu H, Sang Y, Shi X, Guerrero-Cazares H, Quinones-Hinojosa A, Eberhart CG, Laterra J, Ying M. HMMR maintains the stemness and tumorigenicity of glioblastoma stem-like cells. Cancer Res. 2014;74:3168-79.
	16. Zhang M, Zhao D, Yan C, Zhang L, Liang C. Associations between Nine Polymorphisms in EXO1 and Cancer Susceptibility: A Systematic Review and Meta-Analysis of 39 Case-control Studies. Sci Rep. 2016;6:29270.
	17. Bayram S, Akkiz H, Bekar A, Akgollu E, Yildirim S. The significance of Exonuclease 1 K589E polymorphism on hepatocellular carcinoma susceptibility in the Turkish population: a case-control study. Mol Biol Rep. 2012;39:5943-51.
	18. Shao J, Xu Z, Peng X, Chen M, Zhu Y, Xu L, Zhu H, Yang B, Luo P, He Q. Gefitinib Synergizes with Irinotecan to Suppress Hepatocellular Carcinoma via Antagonizing Rad51-Mediated DNA-Repair. PLoS One. 2016;11:e0146968.
	19. Tsai MS, Kuo YH, Chiu YF, Su YC, Lin YW. Down-regulation of Rad51 expression overcomes drug resistance to gemcitabine in human non-small-cell lung cancer cells. J Pharmacol Exp Ther. 2010;335:830-40.
	20. Ma M, Hua S, Li G, Wang S, Cheng X, He S, Wu P, Chen X. Prolyl hydroxylase domain protein 3 and asparaginyl hydroxylase factor inhibiting HIF-1 levels are predictive of tumoral behavior and prognosis in hepatocellular carcinoma. Oncotarget. ___2017;8:12983-13002.
	21. Su Y, Loos M, Giese N, Hines OJ, Diebold I, Gorlach A, Metzen E, Pastorekova S, Friess H, Buchler P. PHD3 regulates differentiation, tumour growth and angiogenesis in pancreatic cancer. Br J Cancer. 2010;103:1571-9.
	22. Liu R, Zhang H, Zhang Y, Li S, Wang X, Wang X, Wang C, Liu B, Zen K, Zhang CY et al. Peroxisome proliferator-activated receptor gamma coactivator-1 alpha acts as a tumor suppressor in hepatocellular carcinoma. Tumour Biol. ___2017;39(4):1010428317695031.
	23. Wang X, Liao Z, Bai Z, He Y, Duan J, Wei L. MiR-93-5p Promotes Cell Proliferation through Down-Regulating PPARGC1A in Hepatocellular Carcinoma Cells by Bioinformatics Analysis and Experimental Verification. Genes (Basel). 2018;9(1).
	24. Hu WQ, Wang W, Fang DL, Yin XF. Identification of Biological Targets of Therapeutic Intervention for Hepatocellular Carcinoma by Integrated Bioinformatical Analysis. Med Sci Monit. 2018;24:3450-3461.
	25. Cui M, Sun J, Hou J, Fang T, Wang X, Ge C, Zhao F, Chen T, Xie H, Cui Y, Yao M, Li J, Li H. The suppressor of cytokine signaling 2 (SOCS2) inhibits tumor metastasis in hepatocellular carcinoma. Tumour Biol. 2016;37:13521-13531.
	26. Qiu X, Zheng J, Guo X, Gao X, Liu H, Tu Y, Zhang Y. Reduced expression of SOCS2 and SOCS6 in hepatocellular carcinoma correlates with aggressive tumor progression and poor prognosis. Mol Cell Biochem. 2013;378(1-2):99-106.
